# Supplementary material for: Proofing Direct-Seeded Rice with Better Root Plasticity and Architecture
Source: MDPI journal article supplement (doi:10.3390/ijms22116058), 2021-06-04
Supplement: s1 [file s1]

**Table S1** Root traits associated QTLs in direct-seeded rice (DSR) conditions

| Trait                   | Donor                      | Population                            | QTLs                                         | Chromosome | Flanking marker                                                                                                               | References |
|-------------------------|----------------------------|---------------------------------------|----------------------------------------------|------------|-------------------------------------------------------------------------------------------------------------------------------|------------|
| Root length             | -                          | HKR47 × MAS26                         | <i>qRL<sub>8.1</sub></i>                     | 8          | RM8243                                                                                                                        | [1]        |
|                         | -                          | HKR47 × MAS26                         | <i>qRL<sub>9.1</sub></i>                     | 9          | RM524-RM257 (13.2-66.1 cM)                                                                                                    |            |
|                         | IR94225-B-82-B,            | MASARB25 × PB1460                     | <i>qRL<sub>8.2</sub></i>                     | 8          | RM547-RM331 (58.1-65.0 cM),                                                                                                   | [1,2]      |
|                         | IR94226-B-177-B            | HKR47 × MAS26                         |                                              |            | RM310-RM547 (57.0-58.1 cM)                                                                                                    |            |
| Root hair length        | IR94225-B-82-B,            | -                                     | <i>qRHL<sub>1.1</sub></i>                    | 1          | -                                                                                                                             | [3]        |
| Root hair density       | IR94226-B-177-B            |                                       |                                              |            |                                                                                                                               |            |
|                         | IR94225-B-82-B,            | -                                     | <i>qRHD<sub>1.1</sub></i>                    | 1          | -                                                                                                                             | [3]        |
|                         | IR94226-B-177-B            |                                       | <i>qRHD<sub>5.1</sub></i>                    | 5          |                                                                                                                               |            |
| Nodal root number       | IR94225-B-82-B,            | -                                     | <i>qNR<sub>5.1</sub></i>                     | 5          | -                                                                                                                             | [3]        |
|                         | IR94226-B-177-B            |                                       | <i>qNR<sub>4.1</sub></i>                     | 4          |                                                                                                                               |            |
| Root volume             | -                          | -                                     | <i>qRV<sub>2.1</sub></i>                     | 2          | RM485-RM7033 (0.0-7.9 cM)                                                                                                     | [4,5]      |
| Root thickness          | -                          | HKR47 × MAS26                         | <i>qRT<sub>1.1</sub></i>                     | 1          | RM488-RM237 (101.4-112.9 cM)                                                                                                  | [4-6]      |
| Fresh root weight       | -                          | MASARB25 × PB1460                     | <i>qFRW<sub>2.1</sub></i>                    | 2          | RM485-RM7033 (0.0-7.9 cM)                                                                                                     | [4,5]      |
| Anaerobic germination   | IR93312-30- 101-20-13-66-6 | Donor:Khao Hlan On, Recipient: IR64   | <i>qAG<sub>9.1</sub></i>                     | 9          | RM8303-RM5526                                                                                                                 | [7]        |
| Early uniform emergence | IR91648-B- 32-B            | Donor: Moroberekan Receipient: Swarna | <i>qAG<sub>9.2</sub></i>                     | 9          |                                                                                                                               |            |
|                         |                            |                                       | <i>qEUE<sub>11.1</sub></i>                   | 11         | id1100085-id11001535                                                                                                          | [8]        |
|                         |                            |                                       | <i>qEMM1.1</i>                               | 1          |                                                                                                                               | [8]        |
| Early vigor             | IR94226-B- 177-B           | Aus276 × MTU1010                      | <i>qEVV<sub>9.1</sub></i><br>(Donor: Aus276) | 9          | Flanking markers: id5000759-id5001182, ud9000737-id9002704,id1005271-id1006691; peak markers: id5001182, ud9000737, id1005271 | [3]        |
| Drought tolerance       | IR74371-46- 1-1            | IR74371-46-1-1/2*Sabitri              | <i>qDTY<sub>12.1</sub></i>                   | 12         | <i>qDTY<sub>12.1</sub></i><br>RM28166-RM28199                                                                                 | [4,5,9,10] |
|                         |                            |                                       | <i>qDTY<sub>2.3</sub></i>                    | 2          | <i>qDTY<sub>2.3</sub></i><br>RM3212-RM250                                                                                     |            |
|                         |                            |                                       | <i>qDTY<sub>3.2</sub></i>                    | 3          | <i>qDTY<sub>3.2</sub></i><br>RM22-RM545                                                                                       |            |

|                    |                  |                                                               |              |   |                                |             |
|--------------------|------------------|---------------------------------------------------------------|--------------|---|--------------------------------|-------------|
|                    | IR6322-34- 223   | Donors: N22, Apo<br>N22/Swarna,<br>Apo/2*Swarna Ldg<br>Rm8213 | $qDTY_{3.1}$ | 3 | $qDTY_{3.1}$ ; RM416           | [6,8,10–12] |
|                    |                  |                                                               | $qDTY_{1.1}$ | 1 | $qDTY_{1.1}$ ; RM11943-RM12091 |             |
|                    |                  |                                                               | $qDTY_{2.1}$ | 2 | $qDTY$ ; RM324                 |             |
| Lodging resistance | IR91648-B- 289-B | Donor: Swarna                                                 | $qLDG_{3.1}$ | 3 | id3000090-id300057             | [8]         |
| Lodging resistance | IR91648-B- 289-B | Donor Moroberekan                                             | $qLDG_{4.1}$ | 4 | id4004461-id4009390            | [8]         |

**Table S2** Chromosome wise QTLs/genes related to root developmental traits in rice along with their locus ID and encoded protein

| Root Phenotype      | Gene                      | Chromosome | Locus ID     |                | Encoded protein                      | References |
|---------------------|---------------------------|------------|--------------|----------------|--------------------------------------|------------|
|                     |                           |            | RAP          | MSU            |                                      |            |
| <b>Crown root</b>   | <i>OsRAA1</i>             | 1          | Os01g0257300 | LOC_Os01g15340 | GTP-binding protein                  | [13]       |
|                     | <i>OsYUC1</i>             | 1          | Os01g0645400 | LOC_Os01g45760 | Flavin monooxygenase                 | [14]       |
|                     | <i>OsPIN3t (OsPIN10a)</i> | 1          | Os01g0643300 | LOC_Os01g45550 | Auxin efflux carrier                 | [15]       |
|                     | <i>OsmiR393a</i>          | 1          | -            | -              | MicroRNA                             | [16]       |
|                     | <i>FIB/OsTAA1</i>         | 1          | Os01g0169800 | LOC_Os01g07500 | Aminotransferase                     | [17]       |
|                     | <i>ERF3</i>               | 1          | Os01g0797600 | LOC_Os01g58420 | AP2/ERF transcription factor         | [18]       |
|                     | <i>REH1/ OsPIN1b</i>      | 2          | Os02g0743400 | LOC_Os02g50960 | Auxin efflux carrier                 | [19]       |
|                     | <i>OsRR2</i>              | 2          | Os02g0557800 | LOC_Os02g35180 | Type-A response regulator            | [20]       |
|                     | <i>OsCAND1</i>            | 2          | Os02g0167700 | LOC_Os02g07120 | SCF <sup>TIR1</sup> ubiquitin ligase | [21]       |
|                     | <i>CRL1/ARL1</i>          | 3          | Os03g0149100 | LOC_Os03g05510 | LOB/ASL transcription factor         | [22,23]    |
|                     | <i>OsCOW1 (OsYUC8)</i>    | 3          | Os03g0162000 | LOC_Os03g06654 | Flavin monooxygenase                 | [24]       |
|                     | <i>CRL4/ OsGNOM1</i>      | 3          | Os03g0666100 | LOC_Os03g46330 | Arf-GEF                              | [25,26]    |
|                     | <i>OsRR1</i>              | 4          | Os04g0442300 | LOC_Os04g36070 | Type-A response regulator            | [27]       |
|                     | <i>OsmiR393b</i>          | 4          | -            | -              | MicroRNA                             | [16]       |
|                     | <i>OsMT2b</i>             | 5          | Os05g0111300 | LOC_Os05g02070 | Metallothionein                      | [28]       |
|                     | <i>OsPIN2</i>             | 6          | Os06g0660200 | LOC_Os06g44970 | Auxin efflux carrier                 | [29]       |
|                     | <i>WOX11</i>              | 7          | Os07g0684900 | LOC_Os07g48560 | WUS-related homeobox protein         | [20]       |
|                     | <i>CRL5</i>               | 7          | Os07g0124700 | LOC_Os07g03250 | AP2/ERF transcription factor         | [27]       |
|                     | <i>CRL6</i>               | 7          | Os07g0497100 | LOC_Os07g31450 | CHD family protein                   | [30]       |
|                     | <i>OsIAA3 (OsIAA31)</i>   | 12         | Os12g0601400 | LOC_Os12g40900 | Aux/IAA protein                      | [31]       |
|                     | <i>OsPID</i>              | 12         | Os12g0614600 | LOC_Os12g42020 | Serine/threonine kinase              | [32]       |
| <b>Lateral root</b> | <i>OsAUX1</i>             | 1          | Os01g0856500 | LOC_Os01g63770 | Auxin influx carrier                 | [33]       |
|                     | <i>LRL2/ OsCYP2</i>       | 2          | Os02g0121300 | LOC_Os02g02890 | Cyclophilin                          | [34]       |
|                     | <i>OsIAA11</i>            | 3          | Os03g0633500 | LOC_Os03g43400 | Aux/IAA protein                      | [35]       |
|                     | <i>OsIAA13</i>            | 3          | Os03g0742900 | LOC_Os03g53150 | Aux/IAA protein                      | [36]       |
|                     | <i>OsHO1</i>              | 6          | Os06g0603000 | LOC_Os06g40080 | Heme oxygenase                       | [29]       |
|                     | <i>OsORC3</i>             | 10         | Os10g0402200 | LOC_Os10g26280 | Origin recognition complex protein   | [37]       |

|                                |                             |    |              |                |                                                               |          |
|--------------------------------|-----------------------------|----|--------------|----------------|---------------------------------------------------------------|----------|
| <b>Root hair number</b>        | <i>OsWOX3A/ OsNS (NAL2)</i> | 11 | Os11g0102100 | LOC_Os11g01130 | WUS-related homeobox protein                                  | [38]     |
|                                | <i>OsWOX3A/ OsNS (NAL3)</i> | 12 | Os12g0101600 | LOC_Os12g01120 | WUS-related homeobox protein                                  | [38]     |
|                                | <i>SOR1</i>                 | 4  | Os04g0101800 | LOC_Os04g01160 | E3 ubiquitin ligase                                           | [39]     |
|                                | <i>OsFHI</i>                | 1  | Os01g0897700 | LOC_Os01g67240 | Multidomain protein                                           | [40]     |
|                                | <i>SRH2</i>                 | 3  | Os03g0300000 | LOC_Os03g18820 | Xyloglucan 6-xylosyltransferase                               | [41]     |
|                                | <i>OsRHL1</i>               | 6  | Os06g0184000 | LOC_Os06g08500 | bHLH transcription factor                                     | [42]     |
|                                | <i>OsEXPA17</i>             | 6  | Os06g0108600 | LOC_Os06g01920 | Expansin                                                      | [43]     |
|                                | <i>RTH1/ OsAPY1</i>         | 7  | Os07g0682800 | LOC_Os07g48430 | ATP diphosphohydrolase                                        | [44]     |
|                                | <i>OsSDNP1</i>              | 10 | Os10g0122600 | LOC_Os10g03400 | Phosphatidylinositol transfer protein                         | [45]     |
|                                | <i>OsEXPA30</i>             | 10 | Os10g0535900 | LOC_Os10g39110 | Expansin                                                      | [43]     |
| <b>Root meristem formation</b> | <i>RTH2/ OsCSLD1</i>        | 10 | Os10g0578200 | LOC_Os10g42750 | Cellulose synthase-like protein                               | [46,47]) |
|                                | <i>QHB</i>                  | 1  | Os01g0854500 | LOC_Os01g63510 | WUSCHEL-type homeobox protein                                 | [48]     |
|                                | <i>DOCS1</i>                | 2  | Os02g0236100 | LOC_Os02g14120 | LRR-RLK                                                       | [49]     |
|                                | <i>OsIAA23</i>              | 6  | Os06g0597000 | LOC_Os06g39590 | Aux/IAA protein                                               | [50]     |
|                                | <i>OsSHR1</i>               | 7  | Os07g0586900 | LOC_Os07g39820 | GRAS transcription factor                                     | [48,51]  |
| <b>Root length</b>             | <i>OsSCR1</i>               | 11 | Os11g0124300 | LOC_Os11g03110 | GRAS transcription factor                                     | [51,52]  |
|                                | <i>OsSPR1</i>               | 1  | Os01g0898300 | LOC_Os01g67290 | Armadillo-like repeat domain protein                          | [53]     |
|                                | <i>OsEXPA8</i>              | 1  | Os01g0248900 | LOC_Os01g14650 | Expansin                                                      | [54]     |
|                                | <i>OsMOGS</i>               | 1  | Os01g0921200 | LOC_Os01g69210 | Mannosyl-oligosaccharide glucosidase                          | [55]     |
|                                | <i>OsCK11</i>               | 2  | Os02g0622100 | LOC_Os02g40860 | Putative casein kinase I                                      | [45]     |
|                                | <i>OsCYT-INV1</i>           | 2  | Os02g0550600 | LOC_Os02g34560 | Alkaline/neutral invertase                                    | [56]     |
|                                | <i>OsARF12</i>              | 4  | Os04g0671900 | LOC_Os04g57610 | Auxin response factor                                         | [57]     |
|                                | <i>RT/OsGLU3</i>            | 4  | Os04g0497200 | LOC_Os04g41970 | Endo-1,4- $\beta$ -D-glucanase                                | [58,59]  |
|                                | <i>OsRPK1</i>               | 5  | Os05g0486100 | LOC_Os05g40770 | LRR-RLK                                                       | [60]     |
|                                | <i>OsDGL1</i>               | 7  | Os07g0209000 | LOC_Os07g10830 | Dolichyl-diphosphooligosaccharide-protein glycosyltransferase | [61]     |

|                                      |                 |    |              |                |                                      |      |
|--------------------------------------|-----------------|----|--------------|----------------|--------------------------------------|------|
| <b>Nutrient uptake related genes</b> | <i>OsGNA1</i>   | 9  | Os09g0488000 | LOC_Os09g31310 | Glucosamine-6-P acetyltransferase    | [62] |
|                                      | <i>DRO1</i>     | 9  | Os09g0439800 | LOC_Os09g26840 |                                      | [63] |
|                                      | <i>PSTOL1</i>   | 12 | Os12g0448900 | LOC_Os12g26290 | receptor-like cytoplasmic kinase     |      |
|                                      | <i>OsPT1</i>    | 3  | Os03g0150600 | LOC_Os03g05620 | inorganic phosphate transporter      | [64] |
|                                      | <i>OsPT8</i>    | 10 | Os10g0444700 | LOC_Os10g30790 | inorganic phosphate transporter      | [53] |
|                                      | <i>OsNAR2.2</i> | 4  | Os04g0480200 | LOC_Os04g40410 | high affinity nitrate transporter    | [65] |
|                                      | <i>OsEXP3</i>   | 5  | Os05g0276500 | LOC_Os05g19570 | Alpha-expansin-3                     | [66] |
|                                      | <i>OsZIP4</i>   | 8  | Os08g0207500 | LOC_Os08g10630 | Zrt-Irt-like protein                 | [67] |
|                                      | <i>TOND1</i>    | 12 | Os12g0630100 | LOC_Os12g43440 | 4,metal cation transporter thaumatin | [68] |

## References

- [1] Y. Qu, P. Mu, H. Zhang, C.Y. Chen, Y. Gao, Y. Tian, F. Wen, Z. Li, Mapping QTLs of root morphological traits at different growth stages in rice, *Genetica*. 133 (2008) 187–200. <https://doi.org/10.1007/s10709-007-9199-5>.
- [2] N. Sandhu, A. Singh, S. Dixit, M.T. Sta Cruz, P.C. Maturan, R.K. Jain, A. Kumar, Identification and mapping of stable QTL with main and epistasis effect on rice grain yield under upland drought stress, *BMC Genet.* (2014). <https://doi.org/10.1186/1471-2156-15-63>.
- [3] N. Sandhu, R.O. Torres, M.T. Sta Cruz, P.C. Maturan, R. Jain, A. Kumar, A. Henry, Traits and QTLs for development of dry direct-seeded rainfed rice varieties, *J. Exp. Bot.* (2015). <https://doi.org/10.1093/jxb/eru413>.
- [4] J. Bernier, A. Kumar, V. Ramaiah, D. Spaner, G. Atlin, A large-effect QTL for grain yield under reproductive-stage drought stress in upland rice, *Crop Sci.* 47 (2007) 507–516.
- [5] R. Venuprasad, M.E. Bool, C.O. Dalid, J. Bernier, A. Kumar, G.N. Atlin, Genetic loci responding to two cycles of divergent selection for grain yield under drought stress in a rice breeding population, *Euphytica*. 167 (2009) 261–269. <https://doi.org/10.1007/s10681-009-9898-3>.
- [6] K.H. Ghimire, L.A. Quiatchon, P. Vikram, B.P.M. Swamy, S. Dixit, H. Ahmed, J.E. Hernandez, T.H. Borromeo, A. Kumar, Identification and mapping of a QTL (qDTY1. 1) with a consistent effect on grain yield under drought, *F. Crop. Res.* 131 (2012) 88–96.
- [7] S.A. Angaji, E.M. Septiningsih, D.J. Mackill, A.M. Ismail, QTLs associated with tolerance of flooding during germination in rice (*Oryza sativa* L.), *Euphytica*. 172 (2010) 159–168. <https://doi.org/10.1007/s10681-009-0014-5>.
- [8] S. Dixit, A. Grondin, C.R. Lee, A. Henry, T.M. Olds, A. Kumar, Understanding rice adaptation to varying agro-ecosystems: Trait interactions and quantitative trait loci, *BMC Genet.* (2015). <https://doi.org/10.1186/s12863-015-0249-1>.

- [9] K.K. Mishra, P. Vikram, R.B. Yadav, B.P.M. Swamy, S. Dixit, M.T.S. Cruz, P. Maturan, S. Marker, A. Kumar, QDTY12.1: A locus with a consistent effect on grain yield under drought in rice, *BMC Genet.* 14 (2013) 1–10. <https://doi.org/10.1186/1471-2156-14-12>.
- [10] P. Vikram, B.P.M. Swamy, S. Dixit, R. Singh, B.P. Singh, B. Miro, A. Kohli, A. Henry, N.K. Singh, A. Kumar, Drought susceptibility of modern rice varieties: An effect of linkage of drought tolerance with undesirable traits, *Sci. Rep.* (2015). <https://doi.org/10.1038/srep14799>.
- [11] A. Kumar, N. Sandhu, S. Dixit, S. Yadav, B.P.M. Swamy, N.A.A. Shamsudin, Marker-assisted selection strategy to pyramid two or more QTLs for quantitative trait-grain yield under drought, *Rice.* (2018). <https://doi.org/10.1186/s12284-018-0227-0>.
- [12] M.S. BP, H.U. Ahmed, A. Henry, R. Mauleon, S. Dixit, P. Vikram, R. Tilatto, S.B. Verulkar, P. Perraju, N.P. Mandal, Genetic, physiological, and gene expression analyses reveal that multiple QTL enhance yield of rice mega-variety IR64 under drought, *PLoS One.* 8 (2013) e62795.
- [13] L. Ge, H. Chen, J.F. Jiang, Y. Zhao, M.L. Xu, Y.Y. Xu, K.H. Tan, Z.H. Xu, K. Chong, Overexpression of OsRAA1 causes pleiotropic phenotypes in transgenic rice plants, including altered leaf, flower, and root development and root response to gravity, *Plant Physiol.* (2004). <https://doi.org/10.1104/pp.104.041996>.
- [14] Y. Yamamoto, N. Kamiya, Y. Morinaka, M. Matsuoka, T. Sazuka, Auxin biosynthesis by the YUCCA genes in rice, *Plant Physiol.* (2007). <https://doi.org/10.1104/pp.106.091561>.
- [15] Q. Zhang, J. Li, W. Zhang, S. Yan, R. Wang, J. Zhao, Y. Li, Z. Qi, Z. Sun, Z. Zhu, The putative auxin efflux carrier OsPIN3t is involved in the drought stress response and drought tolerance, *Plant J.* 72 (2012) 805–816.
- [16] H. Bian, Y. Xie, F. Guo, N. Han, S. Ma, Z. Zeng, J. Wang, Y. Yang, M. Zhu, Distinctive expression patterns and roles of the miRNA393/TIR1 homolog module in regulating flag leaf inclination and primary and crown root growth in rice (*Oryza sativa*), *New Phytol.* 196 (2012) 149–161. <https://doi.org/10.1111/j.1469-8137.2012.04248.x>.
- [17] T. Yoshikawa, M. Ito, T. Sumikura, A. Nakayama, T. Nishimura, H. Kitano, I. Yamaguchi, T. Koshiba, K. Hibara, Y. Nagato, The rice FISH BONE gene encodes a tryptophan aminotransferase, which affects pleiotropic auxin-related processes, *Plant J.* 78 (2014) 927–936.
- [18] Y. Zhao, S. Cheng, Y. Song, Y. Huang, S. Zhou, X. Liu, D.-X. Zhou, The interaction between rice ERF3 and WOX11 promotes crown root development by regulating gene expression involved in cytokinin signaling, *Plant Cell.* 27 (2015) 2469–2483.
- [19] M. Xu, L. Zhu, H. Shou, P. Wu, A PIN1 family gene, OsPIN1, involved in auxin-dependent adventitious root emergence and tillering in rice, *Plant Cell Physiol.* (2005). <https://doi.org/10.1093/pcp/pci183>.
- [20] Y. Zhao, Y. Hu, M. Dai, L. Huang, D.X. Zhou, The WUSCHEL-Related homeobox gene WOX11 is required to activate shoot-borne crown root development in rice, *Plant Cell.* (2009). <https://doi.org/10.1105/tpc.108.061655>.
- [21] X.F. Wang, F.F. He, X.X. Ma, C.Z. Mao, C. Hodgman, C.G. Lu, P. Wu, OsCAND1 is required for crown root emergence in rice, *Mol. Plant.* (2011). <https://doi.org/10.1093/mp/ssq068>.
- [22] Y. Inukai, T. Sakamoto, M. Ueguchi-Tanaka, Y. Shibata, K. Gomi, I. Umemura, Y. Hasegawa, M. Ashikari, H. Kitano, M. Matsuoka, Crown rootless1, which is essential for crown root formation in rice, is a target of an Auxin Response Factor in auxin signaling, *Plant Cell.* (2005). <https://doi.org/10.1105/tpc.105.030981>.

- [23] H. Liu, S. Wang, X. Yu, J. Yu, X. He, S. Zhang, H. Shou, P. Wu, ARL1, a LOB-domain protein required for adventitious root formation in rice, *Plant J.* (2005). <https://doi.org/10.1111/j.1365-313X.2005.02434.x>.
- [24] Y.M. Woo, H.J. Park, M. Su'udi, J. Il Yang, J.J. Park, K. Back, Y.M. Park, G. An, Constitutively wilted 1, a member of the rice YUCCA gene family, is required for maintaining water homeostasis and an appropriate root to shoot ratio, *Plant Mol. Biol.* (2007). <https://doi.org/10.1007/s11103-007-9203-6>.
- [25] Y. Kitomi, A. Ogawa, H. Kitano, Y. Inukai, CRL4 regulates crown root formation through auxin transport in rice, *Plant Root.* 2 (2008) 19–28. <https://doi.org/10.3117/plantroot.2.19>.
- [26] S. Liu, J. Wang, L. Wang, X. Wang, Y. Xue, P. Wu, H. Shou, Adventitious root formation in rice requires OsGNOM1 and is mediated by the OsPINs family, *Cell Res.* 19 (2009) 1110–1119.
- [27] Y. Kitomi, H. Ito, T. Hobo, K. Aya, H. Kitano, Y. Inukai, The auxin responsive AP2/ERF transcription factor CROWN ROOTLESS5 is involved in crown root initiation in rice through the induction of OsRR1, a type-A response regulator of cytokinin signaling, *Plant J.* 67 (2011) 472–484. <https://doi.org/10.1111/j.1365-313X.2011.04610.x>.
- [28] J. Yuan, D. Chen, Y. Ren, X. Zhang, J. Zhao, Characteristic and expression analysis of a metallothionein gene, OsMT2b, down-regulated by cytokinin suggests functions in root development and seed embryo germination of rice, *Plant Physiol.* (2008). <https://doi.org/10.1104/pp.107.110304>.
- [29] Y.H. Chen, Y.Y. Chao, Y.Y. Hsu, C.Y. Hong, C.H. Kao, Heme oxygenase is involved in nitric oxide- and auxin-induced lateral root formation in rice, *Plant Cell Rep.* (2012). <https://doi.org/10.1007/s00299-012-1228-x>.
- [30] Y. Wang, D. Wang, T. Gan, L. Liu, W. Long, Y. Wang, M. Niu, X. Li, M. Zheng, L. Jiang, J. Wan, CRL6, a member of the CHD protein family, is required for crown root development in rice, *Plant Physiol. Biochem.* 105 (2016) 185–194. <https://doi.org/10.1016/j.plaphy.2016.04.022>.
- [31] A. Nakamura, I. Umemura, K. Gomi, Y. Hasegawa, H. Kitano, T. Sazuka, M. Matsuoka, Production and characterization of auxin-insensitive rice by overexpression of a mutagenized rice IAA protein, *Plant J.* 46 (2006) 297–306. <https://doi.org/10.1111/j.1365-313X.2006.02693.x>.
- [32] Y. Morita, J. Kozuka, Characterization of OsPID, the rice ortholog of PINOID, and its possible involvement in the control of polar auxin transport, *Plant Cell Physiol.* 48 (2007) 540–549. <https://doi.org/10.1093/pcp/pcm024>.
- [33] H. Zhao, T. Ma, X. Wang, Y. Deng, H. Ma, R. Zhang, J. Zhao, OsAUX1 controls lateral root initiation in rice (*Oryza sativa*L.), *Plant Cell Environ.* (2015). <https://doi.org/10.1111/pce.12467>.
- [34] B. Kang, Z. Zhang, L. Wang, L. Zheng, W. Mao, M. Li, Y. Wu, P. Wu, X. Mo, OsCYP2, a chaperone involved in degradation of auxin-responsive proteins, plays crucial roles in rice lateral root initiation, *Plant J.* 74 (2013) 86–97. <https://doi.org/10.1111/tjp.12106>.
- [35] Z.X. Zhu, Y. Liu, S.J. Liu, C.Z. Mao, Y.R. Wu, P. Wu, A gain-of-function mutation in OsIAA11 affects lateral root development in rice, *Mol. Plant.* 5 (2012) 154–161. <https://doi.org/10.1093/mp/ssr074>.
- [36] Y. Kitomi, H. Inahashi, H. Takehisa, Y. Sato, Y. Inukai, OsIAA13-mediated auxin signaling is involved in lateral root initiation in rice, *Plant Sci.* 190 (2012) 116–122. <https://doi.org/10.1016/j.plantsci.2012.04.005>.
- [37] X. Chen, J. Shi, X. Hao, H. Liu, J. Shi, Y. Wu, Z. Wu, M. Chen, P. Wu, C. Mao, OsORC3 is required for lateral root development in rice, *Plant J.* 74 (2013)

339–350. <https://doi.org/10.1111/tpj.12126>.

- [38] S.H. Cho, S.C. Yoo, H. Zhang, D. Pandeya, H.J. Koh, J.Y. Hwang, G.T. Kim, N.C. Paek, The rice narrow leaf2 and narrow leaf3 loci encode WUSCHEL-related homeobox 3A (OsWOX3A) and function in leaf, spikelet, tiller and lateral root development, *New Phytol.* (2013). <https://doi.org/10.1111/nph.12231>.
- [39] Y. Uga, E. Hanzawa, S. Nagai, K. Sasaki, M. Yano, T. Sato, Identification of qSOR1, a major rice QTL involved in soil-surface rooting in paddy fields, *Theor. Appl. Genet.* (2012). <https://doi.org/10.1007/s00122-011-1688-3>.
- [40] J. Huang, C.M. Kim, Y.H. Xuan, J. Liu, T.H. Kim, B.K. Kim, C.D. Han, Formin homology 1 (OsFH1) regulates root-hair elongation in rice (*Oryza sativa*), *Planta*. 237 (2013) 1227–1239. <https://doi.org/10.1007/s00425-013-1838-8>.
- [41] C. Wang, S. Li, S. Ng, B. Zhang, Y. Zhou, J. Whelan, P. Wu, H. Shou, Mutation in xyloglucan 6-xylosyltransferase results in abnormal root hair development in *Oryza sativa*, *J. Exp. Bot.* (2014). <https://doi.org/10.1093/jxb/eru189>.
- [42] W. Ding, Z. Yu, Y. Tong, W. Huang, H. Chen, P. Wu, A transcription factor with a bHLH domain regulates root hair development in rice, *Cell Res.* (2009). <https://doi.org/10.1038/cr.2009.109>.
- [43] Z. Yu, B. Kang, X. He, S. Lv, Y. Bai, W. Ding, M. Chen, H.T. Cho, P. Wu, Root hair-specific expansins modulate root hair elongation in rice, *Plant J.* (2011). <https://doi.org/10.1111/j.1365-313X.2011.04533.x>.
- [44] T. Yuo, M. Toyota, M. Ichii, S. Taketa, Molecular cloning of a root hairless gene *rth1* in rice, *Breed. Sci.* 59 (2009) 13–20. <https://doi.org/10.1270/jsbbs.59.13>.
- [45] J. Huang, C.M. Kim, Y.H. Xuan, S.J. Park, H.L. Piao, B. Il Je, J. Liu, T.H. Kim, B.K. Kim, C.D. Han, OsSNDP1, a Sec14-nodulin domain-containing protein, plays a critical role in root hair elongation in rice, *Plant Mol. Biol.* 82 (2013) 39–50. <https://doi.org/10.1007/s11103-013-0033-4>.
- [46] M.K. Chul, H.P. Sung, I.J. Byoung, H.P. Su, J.P. Soon, L.P. Hai, Y.E. Moo, L. Dolan, C.D. Han, OsCSLD1, a cellulose synthase-like D1 gene, is required for root hair morphogenesis in rice, *Plant Physiol.* (2007). <https://doi.org/10.1104/pp.106.091546>.
- [47] T. Yuo, K. Shiotani, N. Shitsukawa, A. Miyao, H. Hirochika, M. Ichii, S. Taketa, Root hairless 2 (RTH2) mutant represents a loss-of-function allele of the cellulose synthase-like gene OSCSLD1 in rice (*Oryza sativa* L.), *Breed. Sci.* (2011). <https://doi.org/10.1270/jsbbs.61.225>.
- [48] N. Kamiya, H. Nagasaki, A. Morikami, Y. Sato, M. Matsuoka, Isolation and characterization of a rice WUSCHEL-type homeobox gene that is specifically expressed in the central cells of a quiescent center in the root apical meristem, *Plant J.* 35 (2003) 429–441. <https://doi.org/10.1046/j.1365-313X.2003.01816.x>.
- [49] S. Sun, M. Gu, Y. Cao, X. Huang, X. Zhang, P. Ai, J. Zhao, X. Fan, G. Xu, A constitutive expressed phosphate transporter, OsPht1;1, modulates phosphate uptake and translocation in phosphate-replete rice, *Plant Physiol.* (2012). <https://doi.org/10.1104/pp.112.196345>.
- [50] J. Ni, G. Wang, Z. Zhu, H. Zhang, Y. Wu, P. Wu, OsIAA23-mediated auxin signaling defines postembryonic maintenance of QC in rice, *Plant J.* (2011). <https://doi.org/10.1111/j.1365-313X.2011.04698.x>.
- [51] H. Cui, M.P. Levesque, T. Vernoux, J.W. Jung, A.J. Paquette, K.L. Gallagher, J.Y. Wang, I. Blilou, B. Scheres, P.N. Benfey, An evolutionarily conserved



mechanism delimiting SHR movement defines a single layer of endodermis in plants, *Science* (80-. ). 316 (2007) 421–425. <https://doi.org/10.1126/science.1139531>.

- [52] N. Kamiya, J. Itoh, A. Morikami, Y. Nagato, M. Matsuoka, The SCARECROW gene's role in asymmetric cell divisions in rice plants, *Plant J.* 36 (2003) 45–54.
- [53] H. Jia, H. Ren, M. Gu, J. Zhao, S. Sun, X. Zhang, J. Chen, P. Wu, G. Xu, The phosphate transporter gene *ospht1;8* is involved in phosphate homeostasis in rice, *Plant Physiol.* (2011). <https://doi.org/10.1104/pp.111.175240>.
- [54] S. Ray, J. Vijayan, R.K. Sarkar, Germination stage oxygen deficiency (GSOD): An emerging stress in the era of changing trends in climate and rice cultivation practice, *Front. Plant Sci.* 7 (2016) 1–4. <https://doi.org/10.3389/fpls.2016.00671>.
- [55] Jaiswal, 基因的改变 NIH Public Access, *Bone*. 23 (2014) 1–7. <https://doi.org/10.1111/tpj.12497>.OsMOGS.
- [56] L. Jia, B. Zhang, C. Mao, J. Li, Y. Wu, P. Wu, Z. Wu, OsCYT-INV1 for alkaline/neutral invertase is involved in root cell development and reproductivity in rice (*Oryza sativa* L.), *Planta*. 228 (2008) 51–59. <https://doi.org/10.1007/s00425-008-0718-0>.
- [57] Y. Qi, S. Wang, C. Shen, S. Zhang, Y. Chen, Y. Xu, Y. Liu, Y. Wu, D. Jiang, OsARF12, a transcription activator on auxin response gene, regulates root elongation and affects iron accumulation in rice (*Oryza sativa*), *New Phytol.* 193 (2012) 109–120.
- [58] Y. Inukai, T. Sakamoto, Y. Morinaka, M. Miwa, M. Kojima, E. Tanimoto, H. Yamamoto, K. Sato, Y. Katayama, M. Matsuoka, H. Kitano, ROOT GROWTH INHIBITING, a Rice Endo-1,4-β-d-Glucanase, Regulates Cell Wall Loosening and is Essential for Root Elongation, *J. Plant Growth Regul.* (2012). <https://doi.org/10.1007/s00344-011-9247-3>.
- [59] J.W. Zhang, L. Xu, Y.R. Wu, X.A. Chen, Y. Liu, S.H. Zhu, W.N. Ding, P. Wu, K.K. Yi, OsGLU3, a putative membrane-bound endo-1,4-beta-glucanase, is required for root cell elongation and division in rice (*Oryza sativa* L.), *Mol. Plant.* (2012). <https://doi.org/10.1093/mp/ssr084>.
- [60] Y. Zou, X. Liu, Q. Wang, Y. Chen, C. Liu, Y. Qiu, W. Zhang, OsRPK1, a novel leucine-rich repeat receptor-like kinase, negatively regulates polar auxin transport and root development in rice, *Biochim. Biophys. Acta - Gen. Subj.* 1840 (2014) 1676–1685. <https://doi.org/10.1016/j.bbagen.2014.01.003>.
- [61] C. Qin, Y. Li, J. Gan, W. Wang, H. Zhang, Y. Liu, P. Wu, OsDGL1, a homolog of an oligosaccharyltransferase complex subunit, is involved in N-glycosylation and root development in rice, *Plant Cell Physiol.* 54 (2013) 129–137. <https://doi.org/10.1093/pcp/pcs159>.
- [62] H. Jiang, S. Wang, L. Dang, S. Wang, H. Chen, Y. Wu, X. Jiang, P. Wu, A novel short-root gene encodes a glucosamine-6-phosphate acetyltransferase required for maintaining normal root cell shape in rice, *Plant Physiol.* 138 (2005) 232–242. <https://doi.org/10.1104/pp.104.058248>.
- [63] Y. Uga, K. Sugimoto, S. Ogawa, J. Rane, M. Ishitani, N. Hara, Y. Kitomi, Y. Inukai, K. Ono, N. Kanno, H. Inoue, H. Takehisa, R. Motoyama, Y. Nagamura, J. Wu, T. Matsumoto, T. Takai, K. Okuno, M. Yano, Control of root system architecture by DEEPER ROOTING 1 increases rice yield under drought conditions, *Nat. Genet.* (2013). <https://doi.org/10.1038/ng.2725>.
- [64] H.M. Seo, Y. Jung, S. Song, Y. Kim, T. Kwon, D.H. Kim, S.J. Jeung, Y.B. Yi, G. Yi, M.H. Nam, J. Nam, Increased expression of OsPT1, a high-affinity phosphate transporter, enhances phosphate acquisition in rice, *Biotechnol. Lett.* (2008). <https://doi.org/10.1007/s10529-008-9757-7>.
- [65] M. Yan, X. Fan, H. Feng, A.J. Miller, Q. Shen, G. Xu, Rice OsNAR2.1 interacts with OsNRT2.1, OsNRT2.2 and OsNRT2.3a nitrate transporters to provide

uptake over high and low concentration ranges, *Plant, Cell Environ.* 34 (2011) 1360–1372. <https://doi.org/10.1111/j.1365-3040.2011.02335.x>.

- [66] S. Qiu, N. Ma, S. Che, Y. Wang, X. Peng, G. Zhang, G. Wang, J. Huang, Repression of OsEXPA3 expression leads to root system growth suppression in rice, *Crop Sci.* (2014). <https://doi.org/10.2135/cropsci2013.11.0746>.
- [67] S.A. Ramesh, R. Shin, D.J. Eide, D.P. Schachtman, Differential metal selectivity and gene expression of two zinc transporters from rice, *Plant Physiol.* (2003). <https://doi.org/10.1104/pp.103.026815>.
- [68] Y. Zhang, L. Tan, Z. Zhu, L. Yuan, D. Xie, C. Sun, TOND1 confers tolerance to nitrogen deficiency in rice, *Plant J.* 81 (2015) 367–376. <https://doi.org/10.1111/tpj.12736>.
